# Supplementary material for: Estimation and evaluation of hourly MetOp satellites GPS DCBs with two different methods
Source: Copernicus journal article supplement (doi:10.5194/angeo-2023-17), 2023-06-12
Supplement: Supplementary file [file angeo-2023-17-AC1-supplement.pdf]

## Reviewer 1:

Thanks for your comments and suggestions, and here is our response.

1) In the abstract, I suggest, within the sentence "Differential code bias (DCB) is one of Global Positioning System (GPS) errors, which affects the calculation of total electron content (TEC) and ionospheric modeling." to replace "which affects" by "which can affect" or "which typically affect" because there are approaches to model and compute the TEC without using pseudoranges, not requiring then to take care on DCBs. They are being used for a long time (Hernández-Pajares et al. 1999), and also recently from the GPS POD MetOp measurements only (Hernández-Pajares et al. 2023).

References:

Hernández-Pajares, M., Juan, J. M., & Sanz, J. (1999). New approaches in global ionospheric determination using ground GPS data. *Journal of Atmospheric and Solar-Terrestrial Physics*, 61(16), 1237-1247.

Hernández-Pajares, M., Olivares-Pulido, G., Hoque, M. M., Prol, F. S., Yuan, L., Notarpietro, R., & Graffigna, V. (2023). Topside Ionospheric Tomography Exclusively Based on LEO POD GPS Carrier Phases: Application to Autonomous LEO DCB Estimation. *Remote Sensing*, 15(2), 390.

Thanks for your suggestion. We have changed this in our revised MS.

2) The assessment is based on the comparison of the receiver DCBs with the reference value provided by COSMIC Data Analysis and Archive Center (CDAAC) for the MetOp A, B and C. Why are you not comparing as well the transmitter DCBs with plenty of external determinations from ground GPS data? They can be obtained from the MetOp POD GPS data only, as it has been recently done in Hernández-Pajares et al. 2023 (see reference above).

Thanks for your comments. In the reference you mentioned, the transmitter DCBs are the GPS DCB. In this study, we focus on the LEO DCBs, which are different from the GPS DCBs. Besides, to improve the accuracy of hourly DCB estimation, we used the GPS DCB products by DLR.

3) In page 2, lines 31-32, the sentence "The accuracy can be as large..." should be replaced by "The errors can be as large..." or similar.

Thanks for your suggestion. We have changed this in our MS.

4) In Equation (9) the magnitude in the DCB is changed, regarding equations (3) and (8), from range (meters) to time delay (s), by means of the explicit light speed term. A different notation between both expressions of DCBs should be used to avoid confusion for the reader between both sets of equations.

Thanks for your suggestion. We have changed this in our MS.

5) At the beginning of page 7, it is indicated that "In fact, it is also possible to estimate the GPS and receiver DCB simultaneously through certain constraints (Liu et al., 2020)." A comment on the fact that both GPS and MetOp receiver DCBs can be separately estimated from the MetOp POD GPS data only (Hernández-Pajares et al. 2023) is missed in this last paragraph of section 2.5.

Thanks for your comments. In this study, our method is to incorporate GPS DCB directly as a known quantity into the formula. For the reference, they estimated the daily GPS DCBs using tomography, which is different from our study. We have revised the words in the revised MS.

6) [Major point] The overall results and corresponding assessment is exclusively based on the receiver DCBs, compared with the reference value provided by COSMIC Data Analysis and Archive Center (CDAAC) for the MetOp A, B and C. The authors don't provide any information on the VTEC results. And this is an important lack in this work, in the experience of this reviewer, because the feasibility of the obtained VTEC (such as no negative values, very small values at local winter high latitude regions, maximum close to the equator) is a crucial information to assess the quality of the studied approach, mapping and DCBs included.

Thanks for your nice comments and good suggestion. Many previous studies were mainly focused on the DCB estimation of ground-based GNSS receivers, and VTEC maps were compared with the other existing VTEC products. However, in this study, we have focused on the space-borne LEO satellite GPS hourly DCBs estimation and comparison between different methods. For the quality of the studied approach, we have compared our estimated LEO GPS receiver DCBs results with the products from CDAAC directly. In the future, we will further estimate and study the high frequency plasmaspheric TEC (PTEC).
